# Supplementary material for: Gut and liver metabolic responses to dietary fructose – are they reversible or persistent after switching to a healthy diet?
Source: Royal Society of Chemistry journal article supplement (doi:10.1039/d1fo00983d), 2021-01-01
Supplement: d1fo00983d1.pdf [file d1fo00983d1.pdf]

## 1 Supplementary Materials

### 2 Table S1: Source of antibodies.

| ANTIBODIES             | SOURCE         | CATALOG NUMBER |
|------------------------|----------------|----------------|
| ABII HRP MOUSE         | PROMEGA        | W4011          |
| ABII HRP RABBIT        | PROMEGA        | W4021          |
| CREB                   | CELL SIGNALING | 9197           |
| GLUT 5                 | INVITROGEN     | PA580022       |
| NFKB                   | SANTACRUZ      | Sc-8008        |
| OCCLUDIN               | INVITROGEN     | 33-15000       |
| p-CREB (Ser133)        | CELL SIGNALING | 9198           |
| p-NFKB p65 (27.Ser536) | SANTACRUZ      | Sc-136548      |
| TRL4                   | SIGMA-ALDRICH  | PRS3141        |

3

4 Table S2: Body weight, energy intake and plasma glucose levels in control, fructose-fed, control-  
5 rescued and fructose-rescued rats.

6

|                              | C        | F        | CR       | FR       |
|------------------------------|----------|----------|----------|----------|
| Final body weight, g         | 314±4    | 310±5    | 380±5    | 390±7    |
| Cumulative energy intake, kJ | 9010±150 | 9040±220 | 8999±254 | 9007±310 |
| Plasma glucose, mg/dl        | 127±10   | 129±8    | 117±5    | 118±7    |

7

8 Data are the means±SEM of 8 different rats. C=control, F=fructose-fed, CR=control-rescued,  
9 FR=fructose-rescued rats.

10

11
